# Supplementary material for: Response of nine triticale genotypes to different salt concentrations at the germination and early seedling stages
Source: PeerJ. 2023 Dec 21;11:e16256. doi: 10.7717/peerj.16256 (PMC10752223; doi:10.7717/peerj.16256)
Supplement: Data S1 [file peerj-11-16256-s001.xlsx]

## Sheet: Sheet1
	Genotypes	Treatments	Reps	Germination rate	Germin. vigor index	Germination (%)	Mean daily germination	Mean germin. Time (days)	Germination energy	Relative salt injury	Seedling vigor index	Shoot length (cm)	Root length (cm)	Root/ shoot ratio	Shoot fresh weight (mg)	Root fresh weight (mg)	Shoot dry weight (mg)	Root dry weight (mg)
	1	1	1	4.55579	35.3796	95.082	13.5831	3.18966	48.3793	0	18.3128	11.52	7.74	0.671875	433	250	50.9	33.8
	1	1	2	4.72326	35.0229	93.1034	13.3005	3.62963	54.7778	0	19.5517	11.98	9.02	0.752922	440	193	51.9	34.9
	1	1	3	4.63953	35.2012	94.0927	13.4418	3.40964	51.5785	0	20.324	12.64	8.96	0.708861	500	234	58.4	34.4
	1	2	1	5.22212	40.1305	98.2143	14.0306	2.67273	53.9636	-3.29433	12.1	7.56	4.76	0.62963	367.4	142	43.8	23
	1	2	2	4.97701	38.8063	94.7368	13.5338	2.72222	51.7222	-1.75439	13.9453	8.94	5.78	0.646532	341.667	142.5	43.3	25.8
	1	2	3	5.09956	39.4684	96.4756	13.7822	2.69747	52.8429	-2.53246	14.4713	9.18	5.82	0.633987	414	216	50.5	30
	1	3	1	4.15686	31.4893	80.3922	11.4846	1.95122	48.5122	15.4496	6.80118	6.08	2.38	0.391447	323	133.3	45.3	19.1
	1	3	2	4.22917	30.1438	87.5	12.5	2.2381	42.2857	6.01852	5.67	4.52	1.96	0.433628	256.4	126	38.2	17.4
	1	3	3	4.47917	33.8194	85.4167	12.2024	3.56098	44.4878	9.22074	6.62833	5.64	2.12	0.375887	291	126.1	41.8	17.7
	1	4	1	3.4	25.2698	71.6667	10.2381	2.06977	51.6279	24.6264	3.38267	3.38	1.34	0.39645	197	90	28.5	15
	1	4	2	3.66667	25.4365	71.3333	10.1905	4.26316	45.7895	23.3827	3.30987	3.3	1.34	0.406061	220	97	28.8	18.4
	1	4	3	3.7	25.8849	71	10.1429	3.66667	46.6667	24.5425	4.189	4.22	1.68	0.398104	250	96	34.7	16.3
	1	5	1	2.87931	19.4828	68.9655	9.85222	3.825	40.6	27.4673	1.33103	1.44	0.49	0.340278	139	72	18.3	14.23
	1	5	2	3.53448	25.0287	70.1379	10.0197	3.23256	52.6047	24.6667	1.57577	1.64	0.606667	0.369919	139.5	65	11.1	13.93
	1	5	3	3.2069	22.2557	71.5517	10.2217	3.52878	46.6023	23.9561	1.85796	1.84	0.756667	0.411232	139.8	66	16.1	14.43
	1	6	1	2.98214	20.4167	62.5	8.92857	3.22857	51.2	34.2672	1.0125	1.2	0.42	0.35	59	48	15.7	12.3
	1	6	2	2.49153	17.0339	54.2373	7.74818	3.40625	51.625	41.7451	1.12814	1.6	0.48	0.3	95	59	16.6	16.8
	1	6	3	2.73683	18.7253	58.3686	8.33838	3.31741	51.4125	37.9669	0.721436	0.916	0.32	0.349345	56	40.7	9.6	12.7
	2	1	1	2.93913	21.2816	65.9574	9.42249	1.45161	36.3871	0	7.88851	7.88	4.08	0.517766	399	189	45.8	23.9
	2	1	2	3.06426	22.738	66	9.42857	3.45455	43.9394	0	8.3985	7.45	5.275	0.708054	248.75	146.25	38.125	20.75
	2	1	3	3.00169	22.0098	65.9787	9.42553	2.45308	40.1632	0	9.65929	8.54	6.1	0.714286	379	162	46	22
	2	2	1	2.95737	22.4064	58.8235	8.40336	2.76667	45.9	10.8159	5.14118	5.36	3.38	0.630597	269	157	34.1	21.6
	2	2	2	3.55337	26.846	72.549	10.3641	2.97297	44.1081	-9.92276	7.47255	6.38	3.92	0.61442	308	131	37.1	18.6
	2	2	3	3.25537	24.6262	65.6863	9.38375	2.86982	45.0041	0.443247	6.55549	6.3	3.68	0.584127	338	156	41.5	22.5
	2	3	1	1.42222	10.4656	31.1111	4.44444	4.92857	35.3571	52.8315	1.87289	4.16	1.86	0.447115	230	117	30	17.5
	2	3	2	1.78723	13.0851	36.1702	5.16717	2.88235	41.4706	45.1966	1.87362	3.46	1.72	0.49711	216	124	31.1	17.8
	2	3	3	1.57778	11.8148	31.1111	4.44444	3.14286	38.5714	52.8468	2.19022	4.64	2.4	0.517241	282	146.25	38.1	24.25
	2	4	1	1.51724	9.78489	22.4138	3.20197	5.07692	40.1538	66.0178	0.869655	2.6	1.28	0.492308	198	90	28.2	12.8
	2	4	2	1.18966	9.29146	28.9655	4.13793	3.54545	31.6364	56.1129	1.14414	2.67	1.28	0.479401	195	93	22.5	16.3
	2	4	3	1.15	9.21429	28.3333	4.04762	5	32.7273	57.0569	1.11822	2.66667	1.28	0.48	196.667	98.3333	27	14.5
	2	5	1	1.22807	8.65497	26.3158	3.7594	3.33333	45.6	60.1019	0.825	2.275	0.86	0.378022	140	93.75	20.25	12.875
	2	5	2	1.15789	8.91813	21.0526	3.00752	2.5	57	68.1021	0.630877	2.14	0.856667	0.400312	148.3	76.9	22.1	14.1
	2	5	3	1.19298	8.78655	23.6842	3.38346	2.91667	51.3	64.1033	0.866842	2.8	0.86	0.307143	165.25	63.25	24.25	13
	2	6	1	0.777778	5.61728	16.6667	2.38095	3.33333	48	74.7312	0.443333	2.14	0.52	0.242991	125.2	64.2	19.2	11.7
	2	6	2	0.807018	6.25731	15.7895	2.25564	2.88889	44.3333	76.0766	0.363158	1.64	0.66	0.402439	89.7	72.5	15.1	13.1
	2	6	3	0.792398	5.9373	16.2281	2.3183	3.11111	46.1667	75.4041	0.327807	1.38	0.64	0.463768	90.7	78	13.3	14.5
	3	1	1	5.22869	39.9672	98.3333	14.0476	2.05085	56.9492	0	15.3203	9.28	6.3	0.678879	390	277	49.3	34.6
	3	1	2	5.35056	40.8464	100	14.2857	2.72727	55	0	17.9	10.22	7.68	0.751468	458	312	56.3	41.9
	3	1	3	5.28963	40.4068	99.1667	14.1667	2.38906	55.9746	0	18.2863	10.98	7.46	0.679417	451	273	57	41
	3	2	1	5.20063	39.965	98.1481	14.0212	2.62264	51.9623	0.188324	11.9152	7.86	4.28	0.544529	381	194	51.4	33
	3	2	2	3.97138	28.9346	86	12.2857	3.27907	40.6977	14	11.3004	8.16	4.98	0.610294	362	210	48.2	29.3
	3	2	3	4.586	34.4498	92.0741	13.1534	2.95086	46.33	7.15219	10.6253	7.24	4.3	0.593923	378	246	48	33.1
	3	3	1	1.95122	14.9593	39.0244	5.57491	3.1875	30.75	60.3142	2.82537	4.92	2.32	0.471545	302	152	40.6	21.5
	3	3	2	2.76	21.3667	54	7.71429	2.77778	42.5926	46	4.158	5.06	2.64	0.521739	292	134	43.8	21.6
	3	3	3	2.3	17.7	46	6.57143	3.13043	41.3043	53.6134	4.2228	6.46	2.72	0.421053	362	180	43.7	32
	3	4	1	1.81633	14.4509	44.898	6.41399	3.54545	33.4091	54.3411	2.34367	3.58	1.64	0.458101	304	125	37.2	15.7
	3	4	2	1.87037	14.7813	24.0741	3.43915	4.61538	29.0769	75.9259	1.23741	3.54	1.6	0.451977	213	100	28.4	15.8
	3	4	3	2.14634	15.2067	48.7805	6.96864	3.3	28.7	50.8096	3.06341	4.62	1.66	0.359307	279	96	31	20.5
	3	5	1	1.21569	8.98693	23.5294	3.36134	2.83333	51	76.0718	0.610196	1.78	0.813333	0.456929	198	75	19.2	14
	3	5	2	2	15.3788	38.6364	5.51948	2.82353	36.2353	61.3636	1.25697	2.36	0.893333	0.378531	196	61	26.6	13
	3	5	3	1.60784	12.1829	31.0829	4.44041	2.82843	43.6176	68.6559	0.932487	2.2	0.8	0.363636	176	78	22.5	13.6
	3	6	1	1.57273	12.6061	34.5455	4.93506	2.57895	52.1053	64.869	0.918909	2.1	0.56	0.266667	127	6	18.8	13.7
	3	6	2	1.58824	12.549	29.4118	4.20168	2.6	44.2	70.5882	0.835294	2.34	0.5	0.213675	170	79	27	16
	3	6	3	1.53048	11.5775	31.9786	4.56837	2.58947	48.1526	67.7527	0.805861	2.1	0.42	0.2	135	67.6	20.2	12.3
	4	1	1	3.77563	29.888	81.1321	11.5903	1.74419	40.6744	0	14.0034	11.12	6.14	0.552158	468	138	61	28.5
	4	1	2	4.40385	34.0705	86.5385	12.3626	2.84444	45.0667	0	14.2962	11.06	5.46	0.493671	473	240	60.7	33.2
	4	1	3	4.08974	31.9792	83.8353	11.9765	2.29432	42.8705	0	15.8113	12.16	6.7	0.550987	500	267	62.9	36.8
	4	2	1	3.78	29.2017	76.7857	10.9694	3.04651	45.5814	5.35714	9.79018	8.7	4.05	0.465517	460	169.5	55.75	26
	4	2	2	4.07078	31.0849	80.7018	11.5288	2.93478	49.5652	6.74464	8.75614	7.2	3.65	0.506944	352	165.75	50	24.375
	4	2	3	3.92539	30.1433	78.7437	11.2491	2.99065	47.5733	6.07326	10.0005	8.175	4.525	0.553517	388	204.5	54.75	28.125
	4	3	1	1.3871	10.8487	38.7097	5.52995	4.91667	25.8333	52.2881	2.96516	4.88	2.78	0.569672	310	146	45.1	21.2
	4	3	2	1.4918	11.7486	37.7049	5.38642	3.65217	34.4783	56.4299	2.54885	4.78	1.98	0.414226	301	132	41.8	20.3
	4	3	3	1.58491	12.5472	30.1887	4.31267	3.3125	46.375	63.9905	2.59019	5.96	2.62	0.439597	358	113	51.7	23.7
	4	4	1	0.833333	6.58333	16.6667	2.38095	3.9	48	79.4574	0.78	3.22	1.46	0.453416	224	89	28.4	12
	4	4	2	0.8	5.08163	14.2857	2.04082	4.125	28	83.4921	0.680952	3.46667	1.3	0.375	225	88.3333	33.3333	16.6667
	4	4	3	0.882759	5.05583	13.7931	1.97044	5.25	21.75	83.5474	0.565517	2.625	1.475	0.561905	191.25	87.5	25.875	15
	4	5	1	0.446429	3.27381	8.92857	1.27551	3	56	88.995	0.176339	1.3	0.675	0.519231	90	62.3333	17.1667	12.1667
	4	5	2	0.649123	4.67836	12.2807	1.75439	2.71429	57	85.809	0.372105	2.125	0.905	0.425882	145	76.25	24.125	16.125
	4	5	3	0.547776	3.97609	10.6046	1.51495	2.85714	56.5	87.3506	0.29693	1.9	0.9	0.473684	141	70	24.25	14.5
	4	6	1	0.589286	4.46429	10.7143	1.53061	2.5	56	86.794	0.203571	1.56667	0.333333	0.212766	100	55	16	10.8333
	4	6	2	0.532203	4.74576	10.7143	1.53061	2.8	59	87.619	0.0964286	0.5	0.4	0.8	30	55	7	10.5
	4	6	3	0.65566	4.10502	10.7143	1.53061	2.65	57.5	87.2198	0.283929	2.15	0.5	0.232558	135	90	20.25	14.5
	5	1	1	4.39273	34.4998	83.6364	11.9481	1.73913	49.0217	0	17.0953	12.1	8.34	0.689256	522	354	61.8	39.3
	5	1	2	4.90288	39.2403	87.5	12.5	2.28571	53.7143	0	16.2225	11.34	7.2	0.634921	551	321	63.8	38.2
	5	1	3	4.64781	36.87	85.5682	12.224	2.01242	51.368	0	13.5711	9.86	6	0.608519	392	245	47.4	31.25
	5	2	1	4.83051	36.7232	94.9153	13.5593	2.91071	52.6786	-13.4856	12.301	7.9	5.06	0.640506	414	233	48.4	28.1
	5	2	2	4.99428	38.9394	96.2963	13.7566	2.78846	47.7692	-10.0529	13.2504	8.62	5.14	0.596288	371	236	52	33.1
	5	2	3	4.91239	37.8313	95.6058	13.658	2.84959	50.2239	-11.7305	12.6008	8.3	4.88	0.587952	446	225	53.1	30.7
	5	3	1	3.13725	23.3193	62.7451	8.96359	3.09375	47.8125	24.9787	5.22039	5.44	2.88	0.529412	325	163	43.3	27
	5	3	2	3.48	26.4	66	9.42857	3.09091	48.4848	24.5714	5.742	6.14	2.56	0.416938	336	143	42.9	24.5
	5	3	3	2.54348	19.7101	47.8261	6.8323	3.22727	41.8182	44.1076	3.79739	5.48	2.46	0.448905	325	145	44.5	25
	5	4	1	2.30508	18.4722	40.8136	5.83051	3.29412	45.1176	51.2012	2.14679	3.68	1.58	0.429348	254	110	32.1	19.7
	5	4	2	2.11864	24.7337	62.7119	8.95884	3.02703	49.4324	28.3293	3.92576	4.84	1.42	0.293388	287	127	40.8	21.8
	5	4	3	2.88136	14.9193	40.678	5.81114	3.375	41.7917	52.4613	2.07458	3.66	1.44	0.393443	254	90	36.9	18.5
	5	5	1	2.16667	15.8025	46.5926	6.65608	2.91304	51.6522	44.2915	1.39933	2.26	0.743333	0.328909	144	94	20.9	22.2
	5	5	2	2.2931	17.1264	46.5517	6.65025	3.07407	49.4074	46.798	1.74724	2.76	0.993333	0.359903	182	90	25.1	11.5
	5	5	3	2.22989	16.4645	46.5722	6.65317	2.99356	50.5298	45.573	1.40027	2.12	0.886667	0.418239	184	92	22.6	17
	5	6	1	2.22807	13.9181	44.9123	6.41604	3.02703	49.2973	46.3005	1.12281	1.98	0.52	0.262626	122.5	79	19.7	16.9
	5	6	2	2.38596	18.4795	45.614	6.51629	2.76923	52.6154	47.8697	1.11298	1.96	0.48	0.244898	116	79	17.6	12.8
	5	6	3	2.30702	16.1988	45.2632	6.46617	2.89813	50.9563	47.1028	1.14968	2.08	0.46	0.221154	125	100	20.4	19.1
	6	1	1	3.6975	28.3544	71.4286	10.2041	1.91429	44.8	0	9.92857	8.12	5.78	0.711823	330	145	40.4	23.5
	6	1	2	4.35179	32.2762	91.3793	13.0542	2.39623	49.2453	0	12.3545	7.94	5.58	0.702771	317	140	38.3	20.6
	6	1	3	4.02465	30.3153	81.4039	11.6291	2.15526	47.0226	0	11.885	8.34	6.26	0.7506	327	166	40.5	23.3
	6	2	1	4.32442	32.5368	94	13.4286	3.29787	40.4255	-31.6	10.387	6.87	4.18	0.608443	299	131	40.7	22.3
	6	2	2	4.23881	31.0571	92.3077	13.1868	3.3125	42.25	-1.01597	9.83077	6.75	3.9	0.577778	290	144	38.5	24.1
	6	2	3	4.28161	31.797	93.1538	13.3077	3.30519	41.3378	-14.4341	9.68334	6.345	4.05	0.638298	292.5	144.75	37.125	19.375
	6	3	1	1.86111	14.8611	36.1111	5.15873	4	27.6923	49.4444	2.51333	4.72	2.24	0.474576	268	135	39.3	21.5
	6	3	2	1.90323	14.6237	35.4839	5.06912	1.54545	28.1818	61.1686	2.57613	5	2.26	0.452	250	121	36.6	19
	6	3	3	2.57143	19.4048	54.7619	7.82313	3.43478	29.2174	32.7282	4.24952	5.4	2.36	0.437037	277	112	37.6	22.2
	6	4	1	1.91935	12.0261	33.871	4.83871	5.28571	20.6667	52.5806	1.82903	3.75	1.65	0.44	240	106.25	30.125	16.75
	6	4	2	1.9	12.1627	41.6667	5.95238	3.92	31.2	54.4025	1.9	3.22	1.34	0.416149	217	83	24.7	12.5
	6	4	3	1.96071	11.1199	33.9286	4.84694	4.57895	32.4211	58.3207	1.45893	3.26	1.04	0.319018	218	99	37	14.3
	6	5	1	1.24074	8.82716	29.6296	4.2328	3.8125	37.125	58.5185	0.928395	2.4	0.733333	0.305556	159.3	87.8	22.8	10.3
	6	5	2	1.33333	10.1543	25.9259	3.7037	2.85714	46.2857	71.6282	0.761358	2.26	0.676667	0.29941	159	71	19.6	12.8
	6	5	3	1.28704	9.49074	27.7778	3.96825	3.33482	41.7054	65.8766	0.943519	2.54	0.856667	0.33727	158	72	21.1	13.2
	6	6	1	0.616667	4.44444	13.3333	1.90476	3.375	52.5	81.3333	0.365333	2.22	0.52	0.234234	81.7	73.4	16.7	13.9
	6	6	2	0.87931	6.23563	18.9655	2.70936	3.36364	47.4545	79.2453	0.580345	2.62	0.44	0.167939	147	61.6	21.4	12.3
	6	6	3	0.747989	5.34004	16.1494	2.30706	3.36932	49.9773	80.1614	0.442494	2.28	0.46	0.201754	124.7	62.4	21.3	13.9
	7	1	1	4.80027	35.2122	96.4912	13.7845	2	52.8545	0	13.8754	8.5	5.88	0.691765	366	125	48.2	17.5
	7	1	2	4.41416	32.996	87.5	12.5	3.36735	50.2857	0	16.9925	10.4	9.02	0.867308	415	267	50.2	33.1
	7	1	3	4.60721	34.1041	91.9956	13.1422	2.68367	51.5701	0	13.7993	8.88	6.12	0.689189	374	121	46.7	20.8
	7	2	1	4.82093	37.23	96.4912	13.7845	2.98182	49.7455	0	12.5825	7.94	5.1	0.642317	392	147	45.4	20
	7	2	2	4.77563	36.7052	94.1176	13.4454	2.8125	43.5625	-7.56303	10.3906	6.14	4.9	0.798046	315	132	46	21
	7	2	3	4.79828	36.9676	95.3044	13.6149	2.89716	46.654	-3.59672	12.523	7.9	5.24	0.663291	314	169	44.5	22.8
	7	3	1	2.73333	21.4709	57.7778	8.25397	4.30769	34.6154	40.1212	4.52978	5.48	2.36	0.430657	312	93.4	42.2	16.1
	7	3	2	3.75	28.7831	83.3333	11.9048	3.4	26.4	4.7619	6.18333	4.86	2.56	0.526749	316	130	42.1	19.7
	7	3	3	2.97778	22.5079	62.2222	8.88889	2.89286	38.5714	32.3639	5.07733	5.28	2.88	0.545455	293	130	42.1	19.5
	7	4	1	2.55849	17.8715	44.0755	6.2965	4.82353	37.4118	54.3218	2.4506	4.02	1.54	0.383085	244	94	27.5	14.6
	7	4	2	2.50357	17.3869	50.0714	7.15306	4.95652	26.7826	42.7755	2.65379	3.9	1.4	0.358974	242	68	37.1	18.3
	7	4	3	2.58214	17.2594	50.6429	7.23469	2.96	42.56	44.9508	2.98793	4.5	1.4	0.311111	240	100	28.1	14.9
	7	5	1	2.06897	15.0287	44.8276	6.40394	3.38462	46.8462	53.5423	1.54057	2.46	0.976667	0.397019	141.7	78	20.7	11.1
	7	5	2	2.2	15.7273	40.2727	5.75325	3.34615	46.5385	53.974	1.18402	2.02	0.92	0.455446	141.2	70	18.5	11
	7	5	3	2.13448	15.378	46.0502	6.57859	3.36538	46.6923	49.9431	1.33085	2.12	0.77	0.363208	141.5	72.3	19.5	10.2
	7	6	1	1.51786	11.3095	28.5714	4.08163	2.6875	56	70.3896	0.674286	1.6	0.76	0.475	88.57	59.65	12.59	9.03
	7	6	2	1.65455	11.8182	34.5455	4.93506	3.21053	52.1053	60.5195	0.595909	1.3	0.425	0.326923	68.77	71.25	11.89	12.28
	7	6	3	1.5862	11.5639	31.5584	4.50835	2.94901	54.0526	65.6957	0.89626	2.2	0.64	0.290909	122.67	77.65	16.59	11.43
	8	1	1	4.91187	36.2781	98.1818	14.026	1.98148	51.9444	0	15.2771	9.14	6.42	0.702407	350	191	43.2	26.2
	8	1	2	4.89671	36.6855	96.5517	13.7931	3.17857	52.8214	0	15.989	9.06	7.5	0.827815	415	195	51.4	29.7
	8	1	3	4.90429	36.4818	97.3668	13.9095	2.58003	52.3829	0	14.8971	8.38	6.92	0.825776	355	171	44.1	25.1
	8	2	1	4.57895	34.9415	91.2281	13.0326	2.98077	49.3269	7.08252	10.8379	6.94	4.94	0.711816	311	140	42.5	23.1
	8	2	2	4.71082	36.1206	91.2281	13.0326	2.78846	52.6154	5.51378	10.8744	7.3	4.62	0.632877	312	151	42.8	22.9
	8	2	3	4.64489	35.5311	91.2281	13.0326	2.88462	50.9712	6.30472	9.72491	6.66	4	0.600601	307	139	43.1	21.9
	8	3	1	3.58974	26.8376	71.7949	10.2564	2.46429	33.4286	26.8756	5.37026	4.96	2.52	0.508065	245	103	37.8	16.8
	8	3	2	2.66667	19.9259	53.3333	7.61905	3	37.5	44.7619	3.38133	4.46	1.88	0.421525	232	93	33.8	15.7
	8	3	3	3.37838	24.1441	70.2703	10.0386	2.5	31.3077	27.8293	4.73622	4.72	2.02	0.427966	278	102	40	16.6
	8	4	1	2.33898	17.565	47.2881	6.75545	4	32.1818	51.8362	2.11378	3.14	1.33	0.423567	194	70	24.2	11.2
	8	4	2	2.48966	18.5197	47.7586	6.82266	5	30.5263	50.5357	2.31629	3.5	1.35	0.385714	216.25	73.75	25.625	12
	8	4	3	2.55424	19.3309	47.1186	6.73123	3.5625	44.25	51.6071	2.74231	4.44	1.38	0.310811	214	81	31.2	12.7
	8	5	1	2.48214	18.4821	48.2143	6.88776	2.85185	49.7778	50.8929	1.84821	2.8	1.03333	0.369048	156	73	25.9	12.8
	8	5	2	2.12963	16.0185	40.7407	5.82011	2.77273	49.0909	57.8042	1.33494	2.38	0.896667	0.376751	130	61	19	11
	8	5	3	2.30589	17.2503	44.4775	6.35393	2.81229	49.4343	54.3196	1.6516	2.74	0.973333	0.355231	160	75	23.6	13.2
	8	6	1	1.38889	10.3395	25.9259	3.7037	2.64286	54	73.594	0.705185	2.08	0.64	0.307692	91.8	61	14.5	10.4
	8	6	2	1.85455	13.9394	34.5455	4.93506	2.63158	55	64.2208	0.877455	1.94	0.6	0.309278	109	56.1	15.9	10.2
	8	6	3	1.62172	12.1395	30.2357	4.31938	2.63722	54.5	68.9466	0.677279	1.78	0.46	0.258427	93.1	69	14.8	15.2
	9	1	1	4.13316	30.2245	84	12	1.92857	45.2381	0	11.5584	9.32	4.44	0.476395	392	129	52.1	22.6
	9	1	2	4.72172	36.0074	92.1569	13.1653	2.68085	46.6596	0	13.4733	9.4	5.22	0.555319	419	175	55.9	22.7
	9	1	3	4.42744	33.116	88.0784	12.5826	2.30471	45.9488	0	13.6522	9.76	5.74	0.588115	456	196	57.2	30.6
	9	2	1	4.30357	32.7976	83.9286	11.9898	2.87234	52.4255	0.085034	9.87	7.92	3.84	0.484848	369	154	52.4	26
	9	2	2	3.97439	29.2734	84.3137	12.0448	3.13953	42.6977	8.51064	7.89176	6.1	3.26	0.534426	365	154	45.2	22
	9	2	3	4.13898	31.0355	84.1211	12.0173	3.00594	47.5616	4.49291	9.47204	7.54	3.72	0.493369	378.333	154	47.0833	23.25
	9	3	1	2.75	21.3889	50	7.14286	2.33333	34	40.4762	3.8	5.28	2.32	0.439394	306	132	43.8	25
	9	3	2	1.5102	11.4626	28.5714	4.08163	2.92857	45.5	68.997	2.14286	5.48	2.02	0.368613	314	131	43.8	20.6
	9	3	3	2.13953	15.7364	44.186	6.31229	3.15789	36.2105	49.8333	3.22264	5.46	1.83333	0.335775	305	135	32.5	20.6667
	9	4	1	1.01667	9.53175	20	2.85714	3.66667	50	76.1905	1.068	3.96	1.38	0.348485	271	84	32.8	14.8
	9	4	2	1.4963	9.83422	25.9259	3.7037	4.5	23.1429	71.8676	1.225	3.375	1.35	0.4	199.5	76.25	30	13
	9	4	3	1.54915	9.97014	27.1186	3.87409	5.0625	25.8125	69.2108	1.48475	4.1	1.375	0.335366	210	83.75	25.625	15.625
	9	5	1	1.36842	10.4386	26.3158	3.7594	2.8	53.2	68.6717	0.622807	1.7	0.666667	0.392157	131	54	15.9	9.6
	9	5	2	0.859649	6.68338	15.7895	2.25564	2.55556	57	82.8667	0.435263	2.12	0.636667	0.300314	131	80	22.3	14.4
	9	5	3	1.11404	8.56099	21.0526	3.00752	2.67778	55.1	76.0979	0.501053	1.7	0.68	0.4	131	54.75	16.75	10.125
	9	6	1	1.12069	8.53448	22.4138	3.20197	3	49.0769	73.3169	0.506552	1.88	0.38	0.202128	104	71	17.3	12.7
	9	6	2	0.45283	3.36478	9.43396	1.34771	3.2	49.4	89.7631	0.166038	1.48	0.28	0.189189	75	50	12.4	9.8
	9	6	3	0.78676	5.94963	15.9239	2.27484	3.1	49.7385	81.9208	0.162424	0.8	0.22	0.275	50	57	8.8	12.3
